# Supplementary material for: Deep Learning-based Prediction of Peptic Ulcer Diseases Caused by Nonsteroidal Anti-inflammatory Drugs Using Longitudinal Electronic Health Records
Source: Research Square preprint supplement (doi:10.21203/rs.3.rs-5457261/v1), 2024-12-03
Supplement: Supplementary file 1 [file ef6b1c3b46498bf355bc3801.docx]

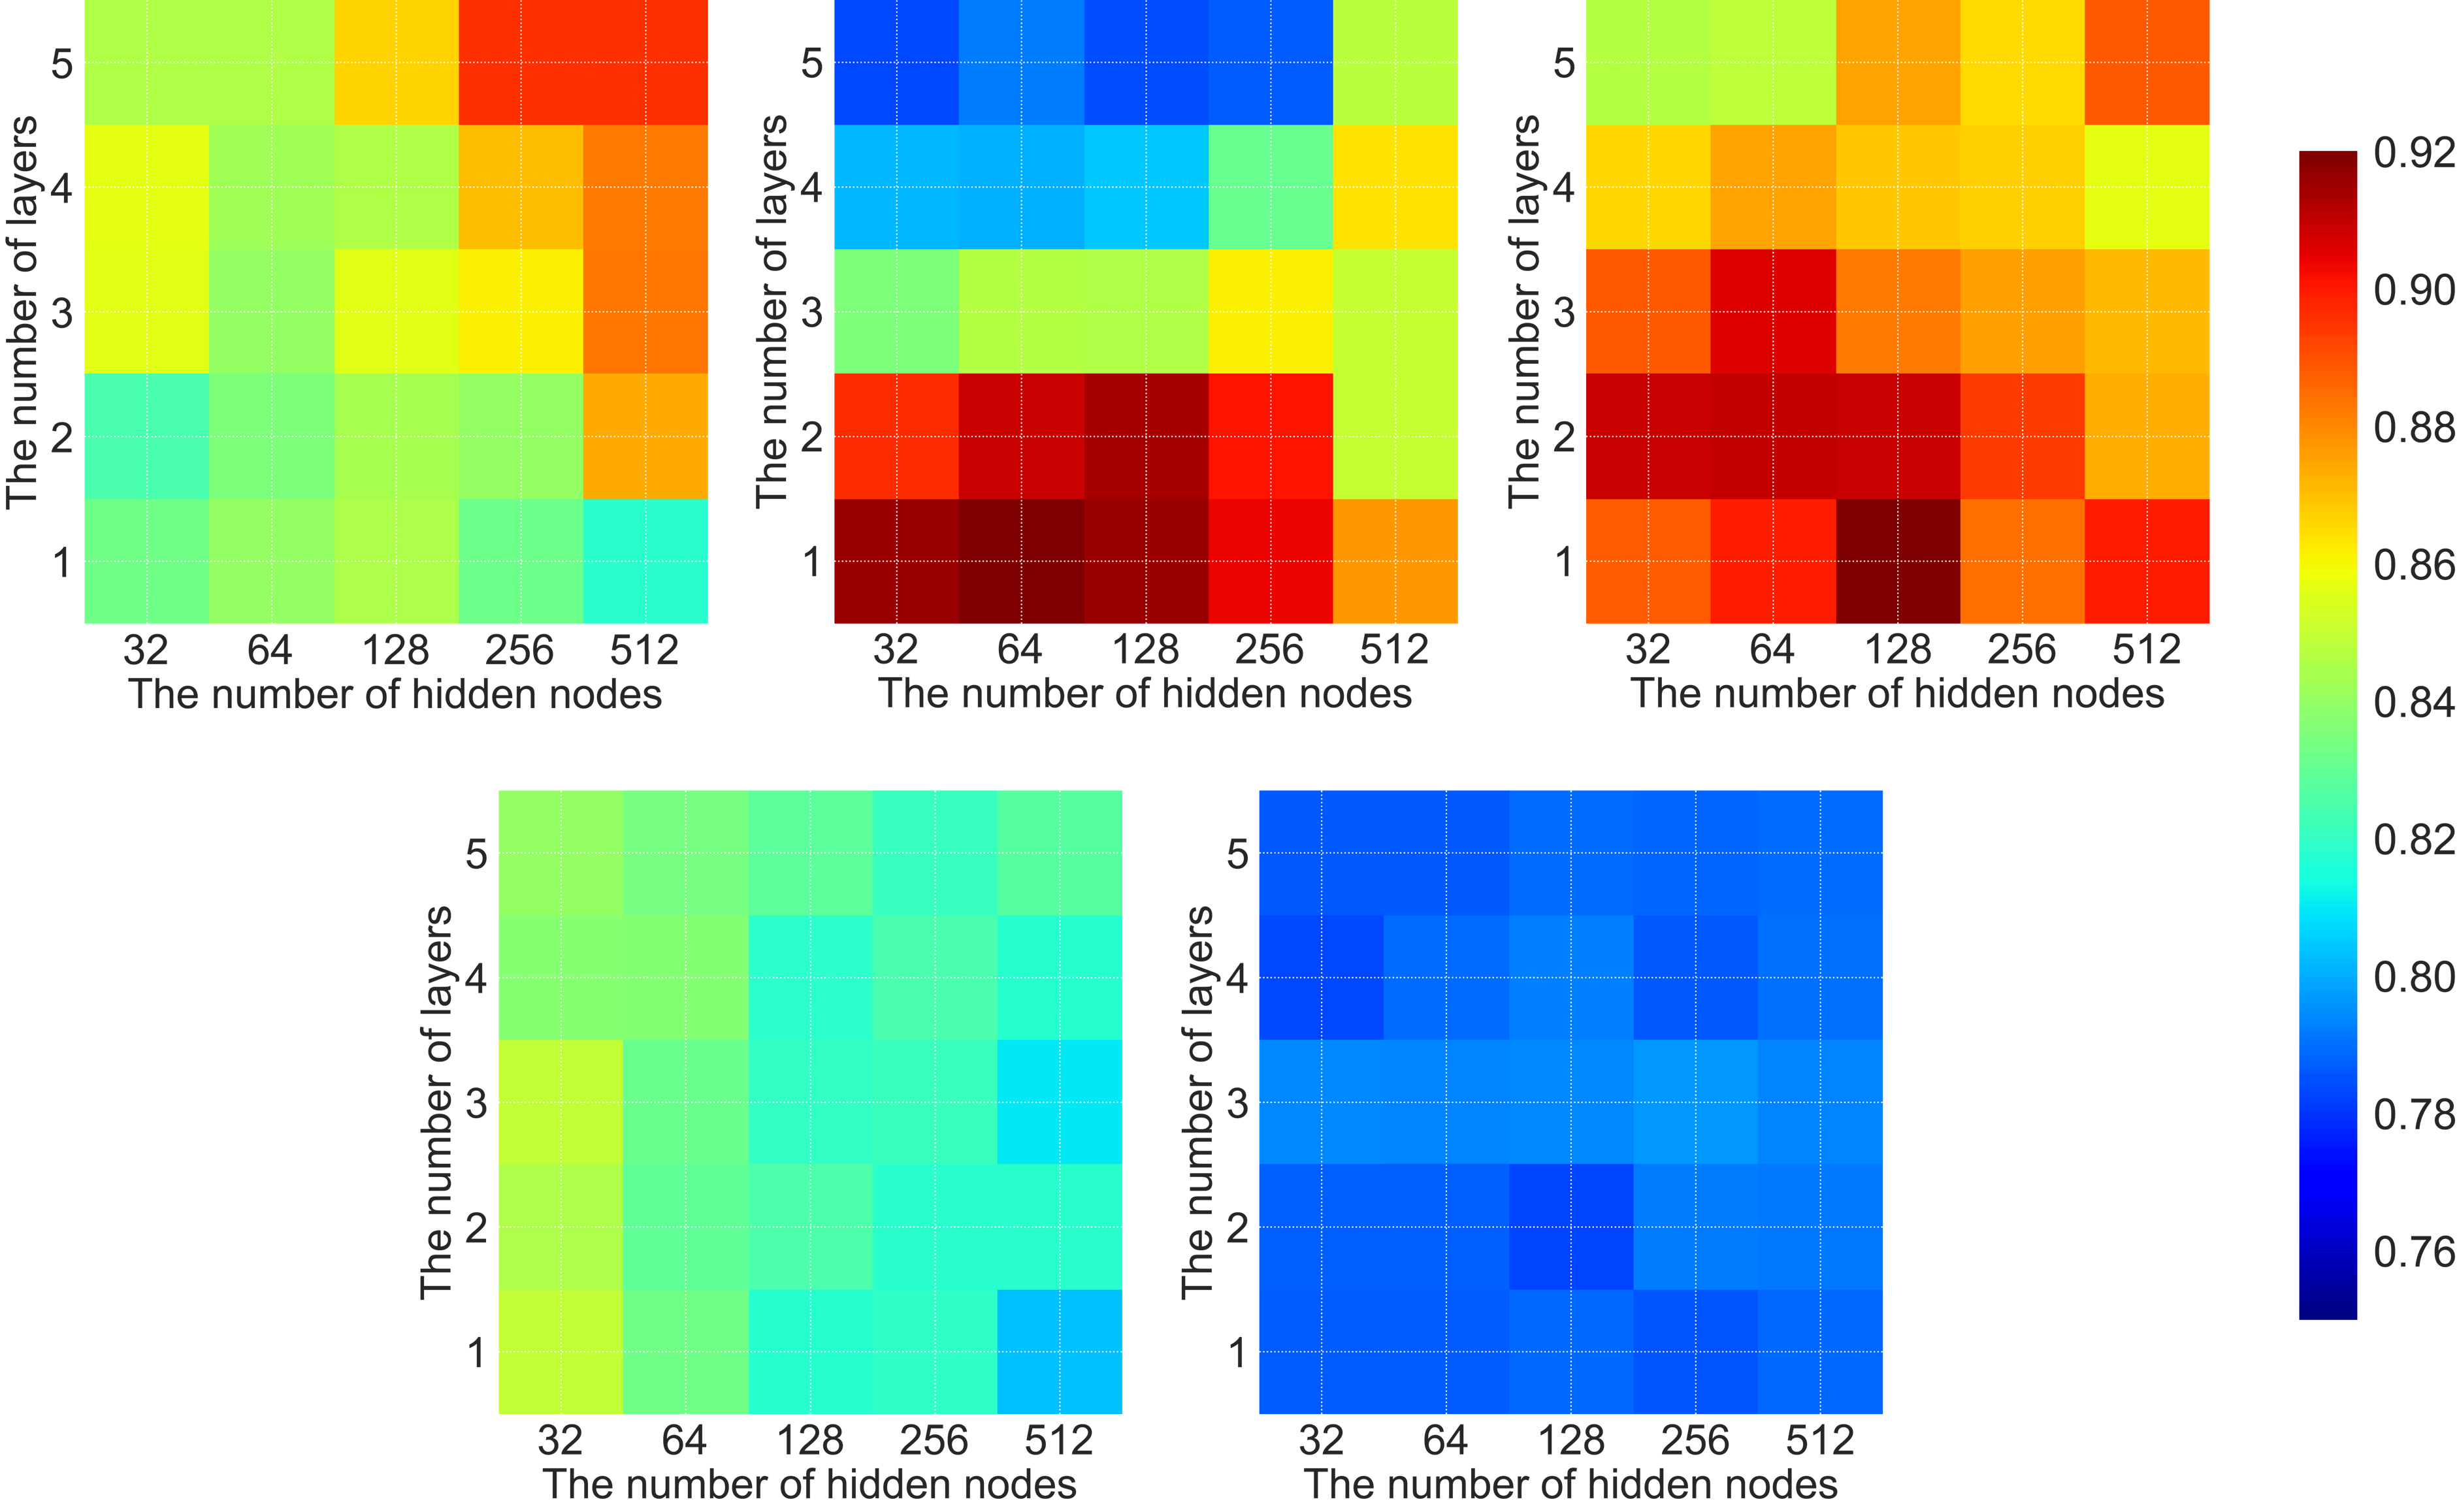


**Supplementary Figure 1**. Performance heatmaps of all models in the development process

**Supplementary Table 1**. Performance for detecting peptic ulcer. All sensitivities are fixed to 0.9

|  | AUROC | P-value | AUPRC | Sensitivity | Specificity | Precision | F1-score |
| --- | --- | --- | --- | --- | --- | --- | --- |
| ***Internal validation*** |  |  |  |  |  |  |  |
| Tree-based model |  |  |  |  |  |  |  |
| Random forest | 0.834 (0.788-0.881) | n/a | 0.145 (0.099-0.191) | 0.909 (0.904-0.913) | 0.512 (0.504-0.520) | 0.012 (0.010-0.014) | 0.023 (0.021-0.026) |
| GBM | 0.860 (0.816-0.903) | 0.0308 | 0.130 (0.086-0.173) | 0.909 (0.904-0.913) | 0.490 (0.482-0.498) | 0.011 (0.010-0.013) | 0.022 (0.020-0.025) |
| RNN-based model |  |  |  |  |  |  |  |
| Simple RNN | 0.896 (0.860-0.933) | 0.2648 | 0.184 (0.147-0.220) | 0.909 (0.904-0.913) | 0.692 (0.685-0.699) | 0.018 (0.016-0.021) | 0.036 (0.033-0.039) |
| LSTM | 0.937 (0.921-0.954) | 0.0139 | 0.164 (0.148-0.181) | 0.909 (0.904-0.913) | 0.805 (0.798-0.811) | 0.029 (0.026-0.032) | 0.056 (0.052-0.060) |
| GRU | **0.941 (0.923-0.959)** | 0.0130 | 0.090 (0.072-0.108) | 0.909 (0.904-0.913) | **0.870 (0.865-0.875)** | **0.043 (0.040-0.046)** | **0.082 (0.077-0.086)** |
| Attention-based model |  |  |  |  |  |  |  |
| Transformer | 0.834 (0.786-0.881) | 0.9934 | **0.188 (0.140-0.236)** | 0.909 (0.904-0.913) | 0.473 (0.465-0.481) | 0.011 (0.009-0.013) | 0.021 (0.019-0.024) |
| RETAIN | 0.765 (0.709-0.820) | 0.3016 | 0.057 (0.002-0.113) | 0.909 (0.904-0.913) | 0.176 (0.170-0.182) | 0.007 (0.006-0.008) | 0.014 (0.012-0.016) |
| ***External validation*** |  |  |  |  |  |  |  |
| Tree-based model |  |  |  |  |  |  |  |
| Random forest | 0.807 (0.782-0.832) | n/a | 0.106 (0.081-0.131) | 0.901 (0.898-0.904) | 0.406 (0.401-0.410) | 0.011 (0.010-0.012) | 0.021 (0.020-0.022) |
| GBM | 0.839 (0.816-0.861) | 0.0048 | 0.074 (0.051-0.096) | 0.901 (0.898-0.904) | 0.526 (0.521-0.530) | 0.013 (0.012-0.014) | 0.026 (0.025-0.028) |
| RNN-based model |  |  |  |  |  |  |  |
| Simple RNN | 0.882 (0.863-0.901) | <0.0001 | 0.112 (0.093-0.132) | 0.901 (0.898-0.904) | 0.607 (0.603-0.611) | 0.016 (0.015-0.017) | 0.031 (0.030-0.033) |
| LSTM | 0.908 (0.894-0.922) | <0.0001 | 0.155 (0.141-0.170) | 0.901 (0.898-0.904) | 0.739 (0.735-0.743) | 0.024 (0.022-0.025) | 0.046 (0.044-0.048) |
| GRU | **0.964 (0.957-0.970)** | <0.0001 | **0.225 (0.218-0.231)** | 0.904 (0.902-0.907) | **0.899 (0.896-0.901)** | **0.059 (0.057-0.061)** | **0.111 (0.108-0.114)** |
| Attention-based model |  |  |  |  |  |  |  |
| Transformer | 0.814 (0.786-0.842) | 0.7930 | 0.189 (0.161-0.216) | 0.901 (0.898-0.904) | 0.361 (0.357-0.365) | 0.010 (0.009-0.011) | 0.019 (0.018-0.021) |
| RETAIN | 0.780 (0.752-0.807) | 0.1823 | 0.057 (0.029-0.084) | 0.901 (0.898-0.904) | 0.396 (0.392-0.401) | 0.010 (0.010-0.011) | 0.021 (0.019-0.022) |

*Bold indicates the best and underline indicates the second best.
*P-values were calculated using the DeLong method.
*Abbreviations: AUROC=area under the receiver operating characteristic curve, AUPRC=area under the precision-recall curve, GBM=gradient boosting machine, RNN=recurrent neural network, LSTM=long short-term memory, GRU=gated recurrent unit

**Supplementary Table 2**. Concept IDs (SNOMED) of peptic ulcers used in the study

| Diseases | Concept IDs | Diseases | Concept IDs |
| --- | --- | --- | --- |
| Esophageal ulcer | 25844 | **Gastric ulcer, acute with hemorrhage** | **4231580** |
| Dieulafoy's ulcer | 198798 | **Chronic or unspecified duodenal ulcer with hemorrhage** | **4232181** |
| Duodenal obstruction | 434085 | **Acute duodenal ulcer with perforation** | **4265479** |
| Peptic ulcer | 4027663 | Gastric ulcer | 4265600 |
| **Acute duodenal ulcer with hemorrhage** | **4027729** | **Peptic ulcer bleeding** | **4271696** |
| Chronic duodenal ulcer without hemorrhage or perforation | 4028242 | Gastric ulcer, chronic | 4318534 |
| **Peptic ulcer, acute with hemorrhage** | **4046500** | Gastric ulcer, acute | 4319441 |
| Peptic ulcer, acute | 4057060 | **Perforation, peptic ulcer** | **4338225** |
| Duodenal ulcer scar with obstruction | 4057074 | Gastric ulcer scar | 4340787 |
| **Gastric ulcer, acute with perforation** | **4057953** | Gastric erosion, chronic | 4341234 |
| Acute gastric mucosal lesion | 4087594 | Cushing's ulcer of duodenum | 4341240 |
| Peptic ulcer, chronic | 4134146 | Curling's ulcers of stomach | 36683388 |
| Gastric erosion, chronic with hemorrhage | 4143871 | Helicobacter pylori-positive duodenal ulcer | 37110314 |
| **Peptic ulcer, chronic with perforation** | **4146517** | Cushing's ulcer of stomach | 42538071 |
| **Chronic or unspecified gastric ulcer with perforation** | **4150681** | Helicobacter pylori-positive gastric ulcer | 45757062 |
| **Duodenal perforation** | **4156639** | Erosive gastritis | 45757242 |
| **Gastric ulcer, acute with hemorrhage and perforation** | **4169592** | **Hematemesis** | **26727** |
| **Chronic or unspecified duodenal ulcer with perforation** | **4173408** | **Gastrointestinal hemorrhage** | **192671** |
| **Peptic ulcer, chronic with hemorrhage** | **4174044** | **Hematochezia** | **443530** |
| **Peptic ulcer, acute with perforation** | **4194543** | **Melena** | **4103703** |
| Duodenal ulcer without helicobacter pylori | 4198381 | **Gastric outlet obstruction** | **4216750** |
| **Gastric ulcer, chronic with hemorrhage** | **4211001** | **Gastric perforation** | **4340781** |
|  |  |  |  |

* Bold indicates complicated peptic ulcer.

**Supplementary Table 3**. Concept IDs (RxNorm) of NSAIDs used in the study

| NSAIDs | Drug name | Concept ID |
| --- | --- | --- |
| Oxicam | Meloxicam | 19103397, 19103398 |
|  | Piroxicam | 1146847, 19019665, 19022024 |
| Salicylic acid | Aspirin | 1112896, 1113143, 1718409, 19021575, 19059056, 42483115, 42949808, 42949815 |
| Acetic acid | Aceclofenac | 19029394, 35856180, 42926507, 42926777 |
|  | Indomethacin | 1178665 |
|  | Ketorolac | 19133853, 46287424 |
|  | Diclofenac | 42707518 |
| Propionic acid | Naproxen | 1115126, 19019273, 19060300, 40992339 |
|  | Ibuprofen | 19019050, 19019072, 19078461, 35887295, 42923605, 42948430 |
|  | Celecoxib | 1118091, 19029024, 19029025 |
|  | Loxoprofen | 19106551 |
|  | Ketoprofen | 19101779, 41339997, 43842952 |

**Supplementary Table 4**. Concept IDs (RxNorm) of other drugs used in the study

| Drug group | Drug name | Concept ID |
| --- | --- | --- |
| Anticoagulation | Apixaban | 43013026, 43013029, 43013030 |
|  | Enoxaparine | 40160973, 40160989, 43286599, 43286713 |
|  | Dabigatran | 35606208, 40228154 |
| Antiplatelet | Clopidogrel | 19075601, 42949808, 42949815 |
|  | Cilostazol | 1350311, 1350332, 1350335, 2061565, 42926306, 42926362, 42935771, 42935832 |
| Steroid | Triamcinolone | 2022428, 19019891, 19019892, 19019893, 21158208, 40085539, 41051895, 41330793, 41353315, 42629020, 43753628 |
|  | Dexamethasone | 1518258, 21140183, 36282892, 36895323, 40160930, 42479180, 42918030, 42918064, 42919616, 42920795, 43751837 |
|  | MethylPrednisolone | 1506426, 1506430, 35606533, 35606538, 36895129, 41178645, 41481149, 41481403, 42917274, 43521245, 43521260, 44208595 |
|  | Prednisolone | 1550775, 2022371, 2034053, 35781236, 35782103, 42917659, 43829030 |
|  | Hydrocortisone | 975168, 975193, 975505, 2021908, 2026650, 19026511, 21117513, 21156799, 35604734, 35885856, 41478043, 41487478, 42917277, 43286238 |
|  | Betamethasone | 920828, 21039240, 36897449, 41328951, 41502217, 42917334, 42917855 |
| H2 blocker | Famotidine | 19077241 |
|  | Cimetidine | 997341, 42944094, 2073468, 2033070, 42922401, 19081086, 42922400, 2073465, 42944157 |
|  | Lafutidine | 42961124 |
| P-CAB | Tegoprazan | 2012376 |
| Proton pump inhibitors | Pantoprazole | 41271459, 41302588, 948080 |
|  | Lansoprazole | 19095273, 19095231, 19133802, 19039961 |
|  | Omeprazole | 21161812, 19101746, 19101745, 19081766, 19081767, 904455, 40992339, 904454, 19112920 |
|  | Rabeprazole | 40834416, 41021231, 35152933 |
|  | Ilaprazole | 42961063 |
|  | Dexlansoprazole | 19039961, 19133802 |

*Abbreviations: P-CAB=potassium-competitive acid blocker

**Supplementary Table 5**. Concept IDs (LOINC) of laboratory items (measurements) used in the study

| Laboratory items (Measurement) | Concept ID |
| --- | --- |
| Hemoglobin | 3000963 |
| Platelet | 3024929 |
| BUN | 3013682 |
| Creatinine | 3016723 |

**Supplementary Table 6**. Concept IDs (SNOMED) of surgeries (procedures) used in the study

| Surgery (Procedure) | Concept ID |
| --- | --- |
| Gastrectomy | 4070372, 4070869, 4071534, 4071537, 4131021, 4144927, 4174035, 4222325, 4233414, 4239077, 4310408, 44809029, 46270977, 46272798, 4131021 |
| Pancreaticoduodenectomy | 4020329, 4022013, 4020330, 4117192, 4144849 |
